# Supplementary material
Source: publisher figshare collection journal article supplement (https://tandf.figshare.com/articles/dataset/_/11763465)

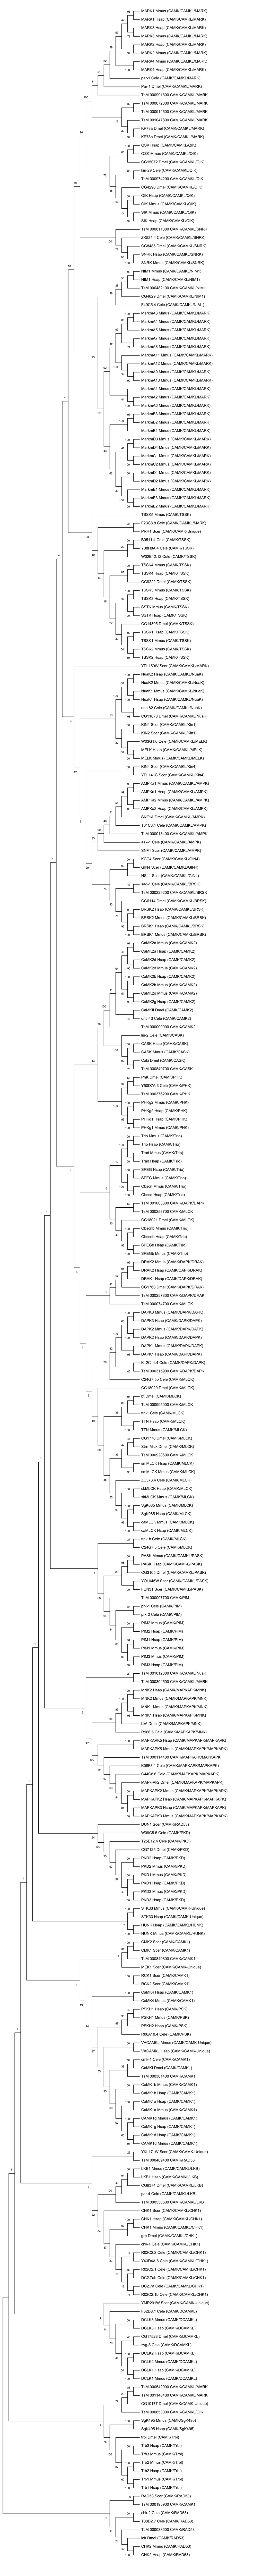

Supplement: Supplementary file 1 [file 1]

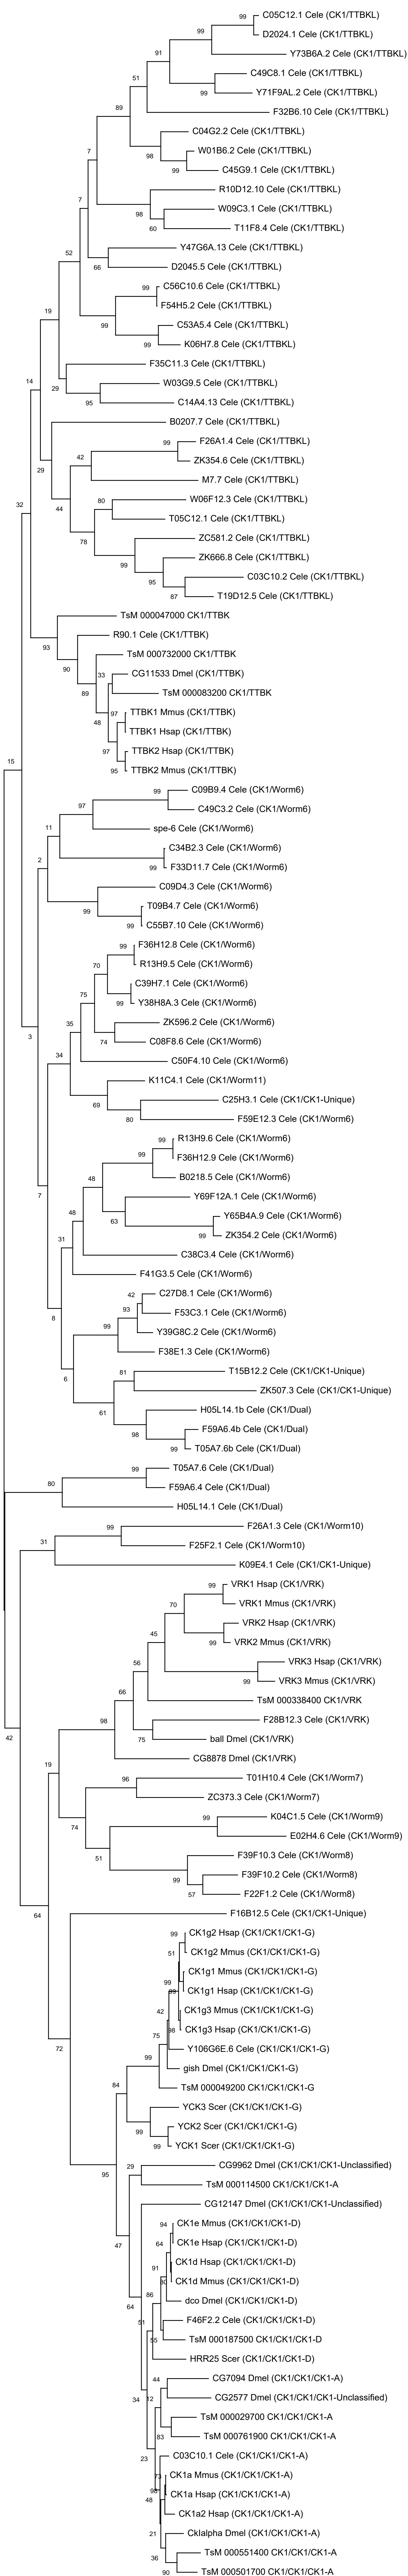

0.50

Supplement: Supplementary file 2 [file 1]

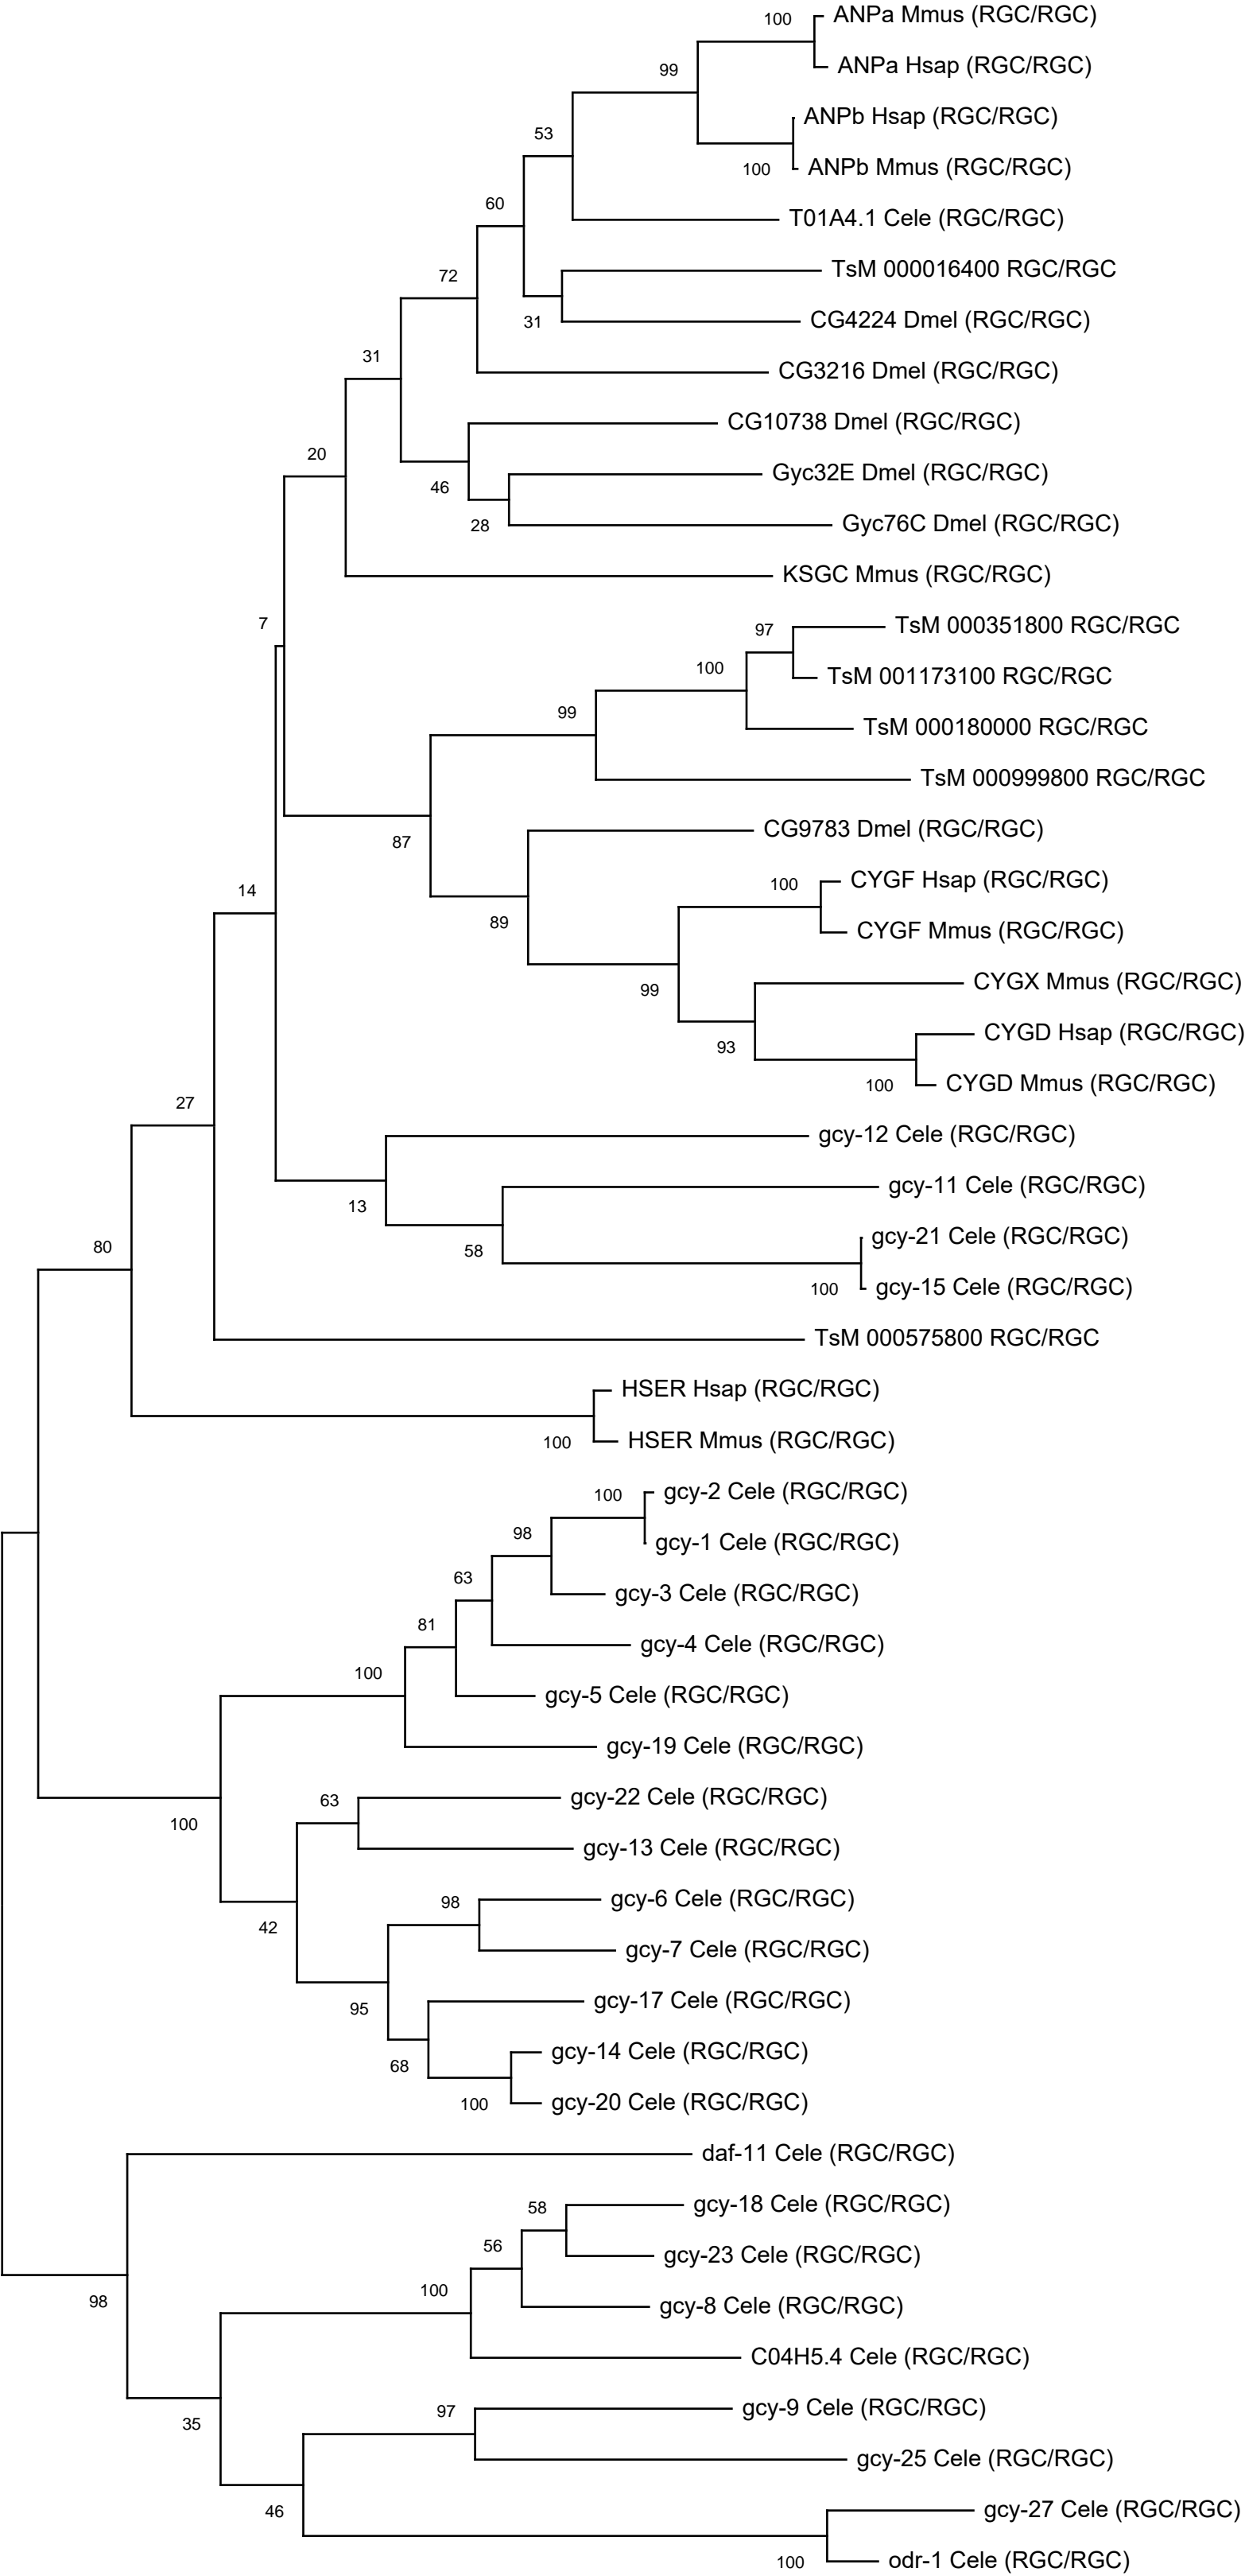

0.50

Supplement: Supplementary file 3 [file 1]

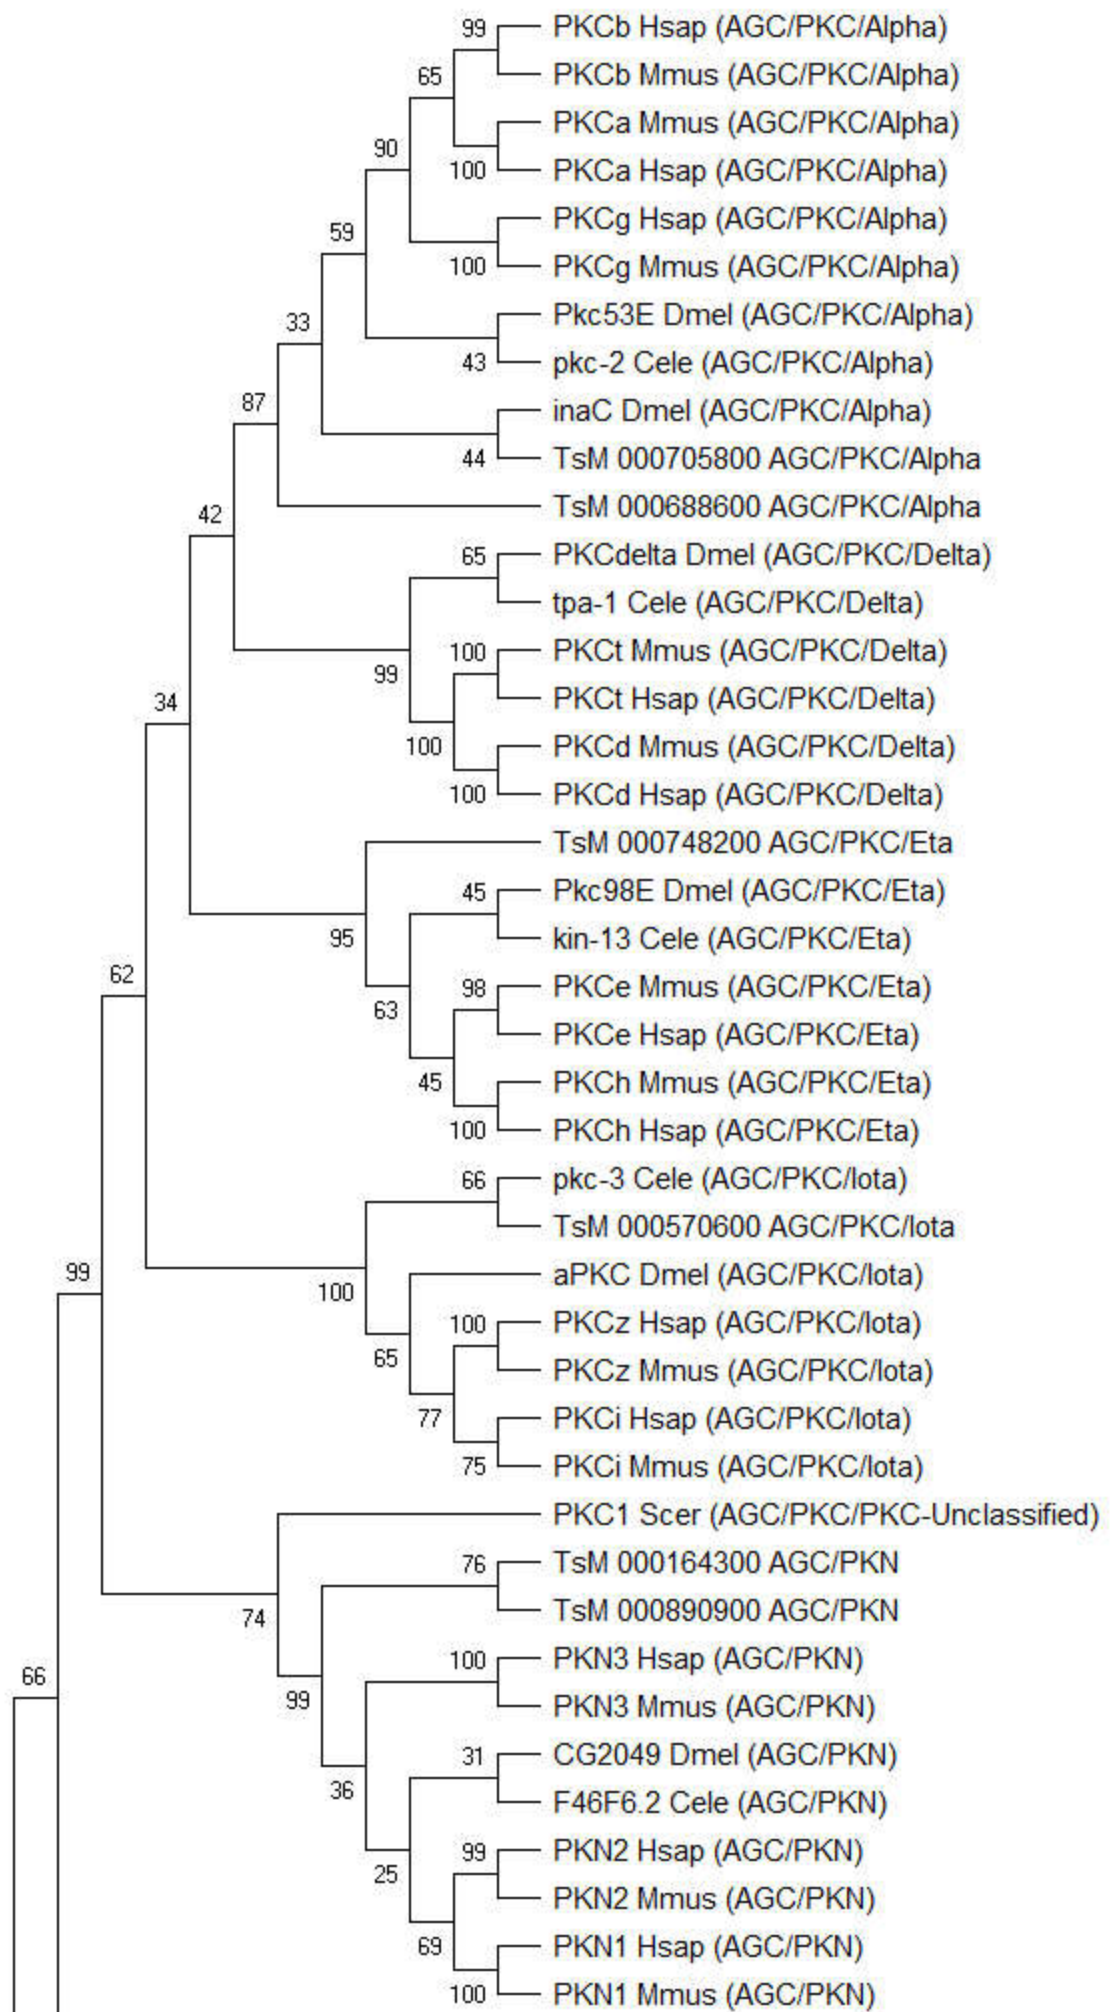

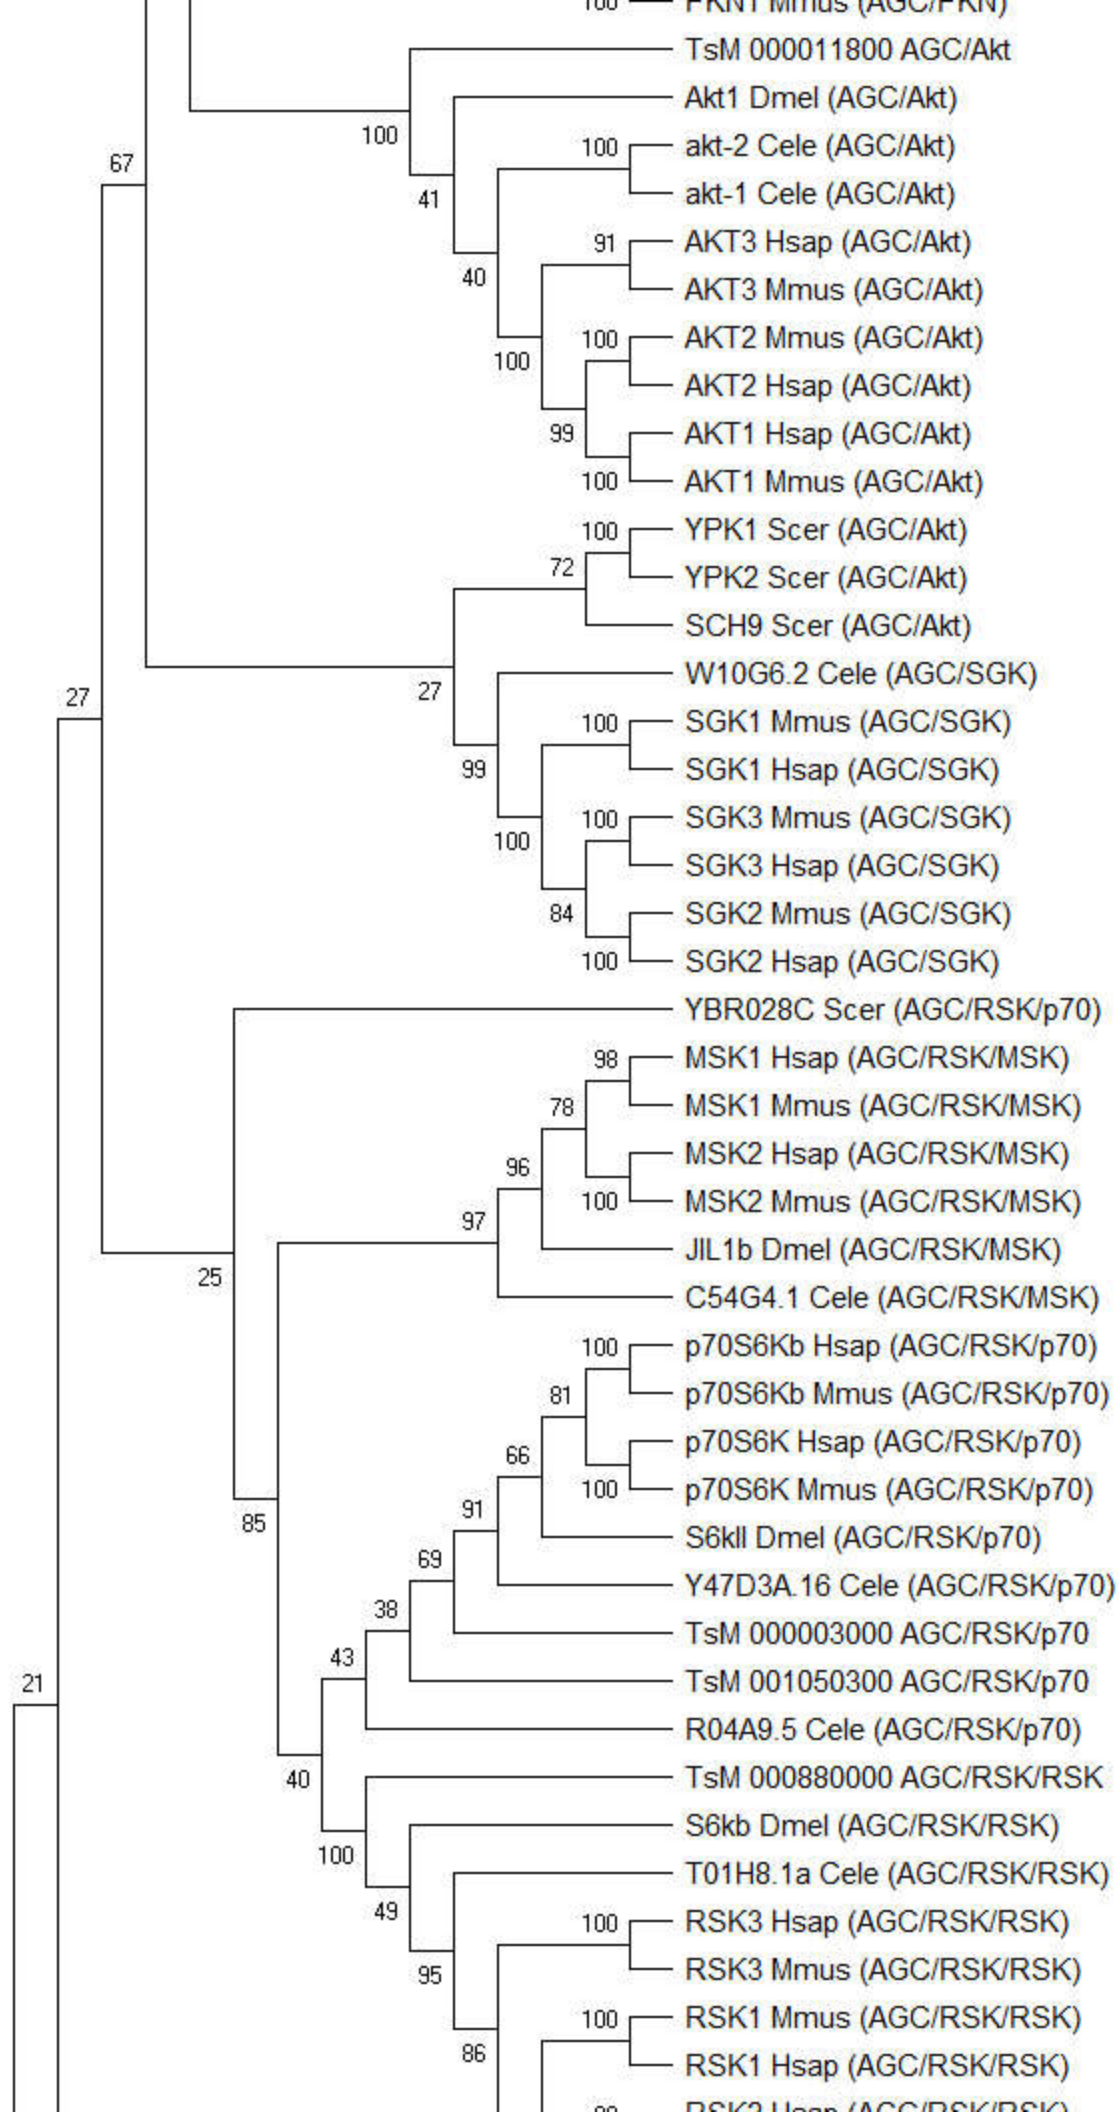



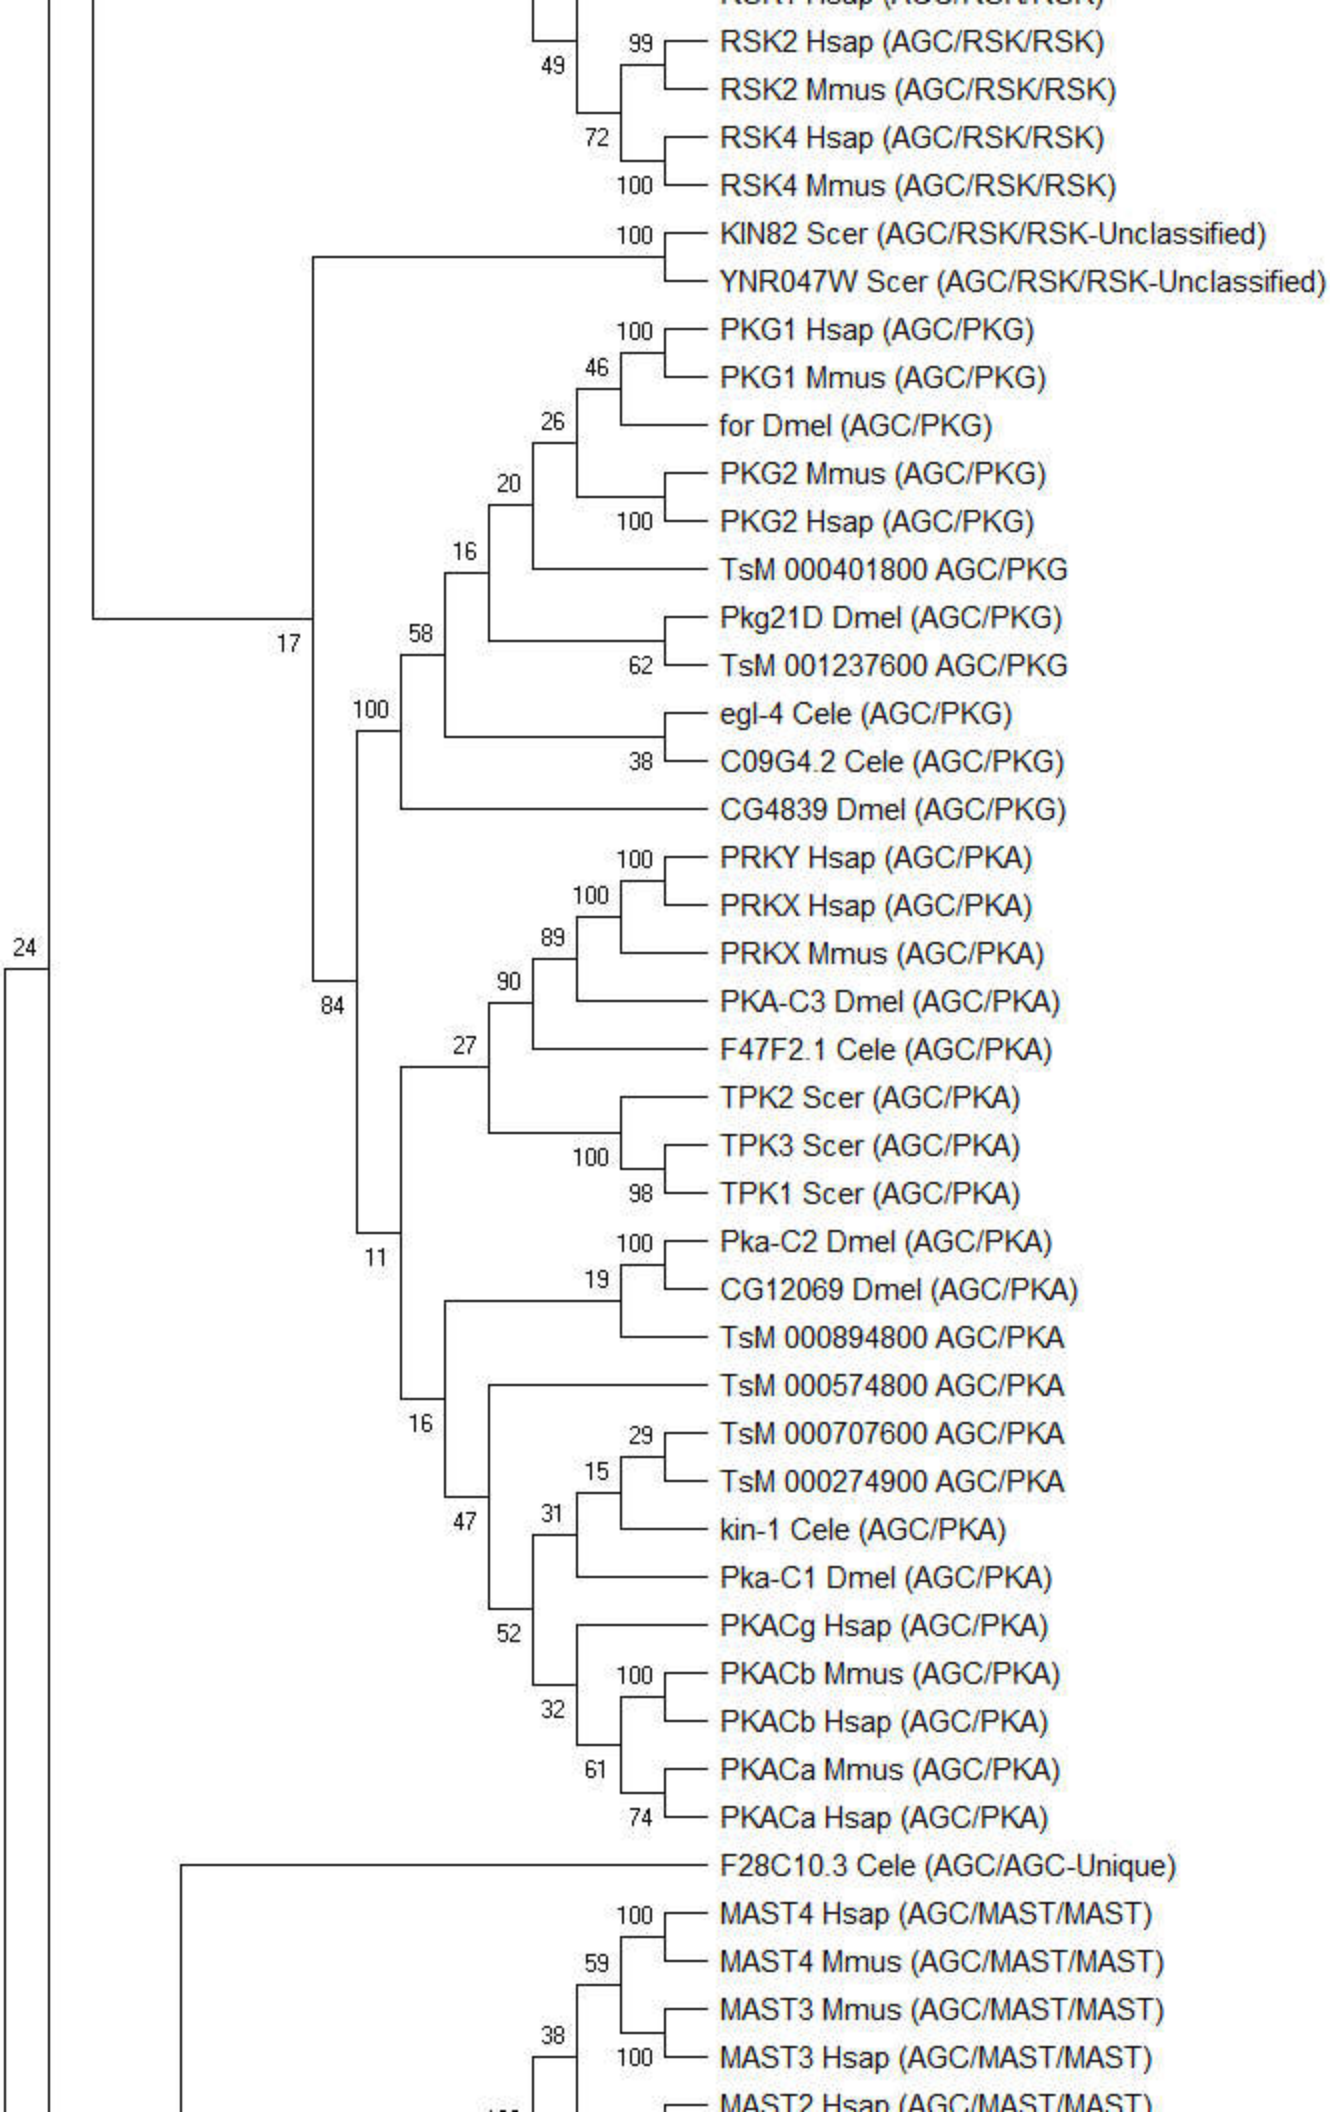

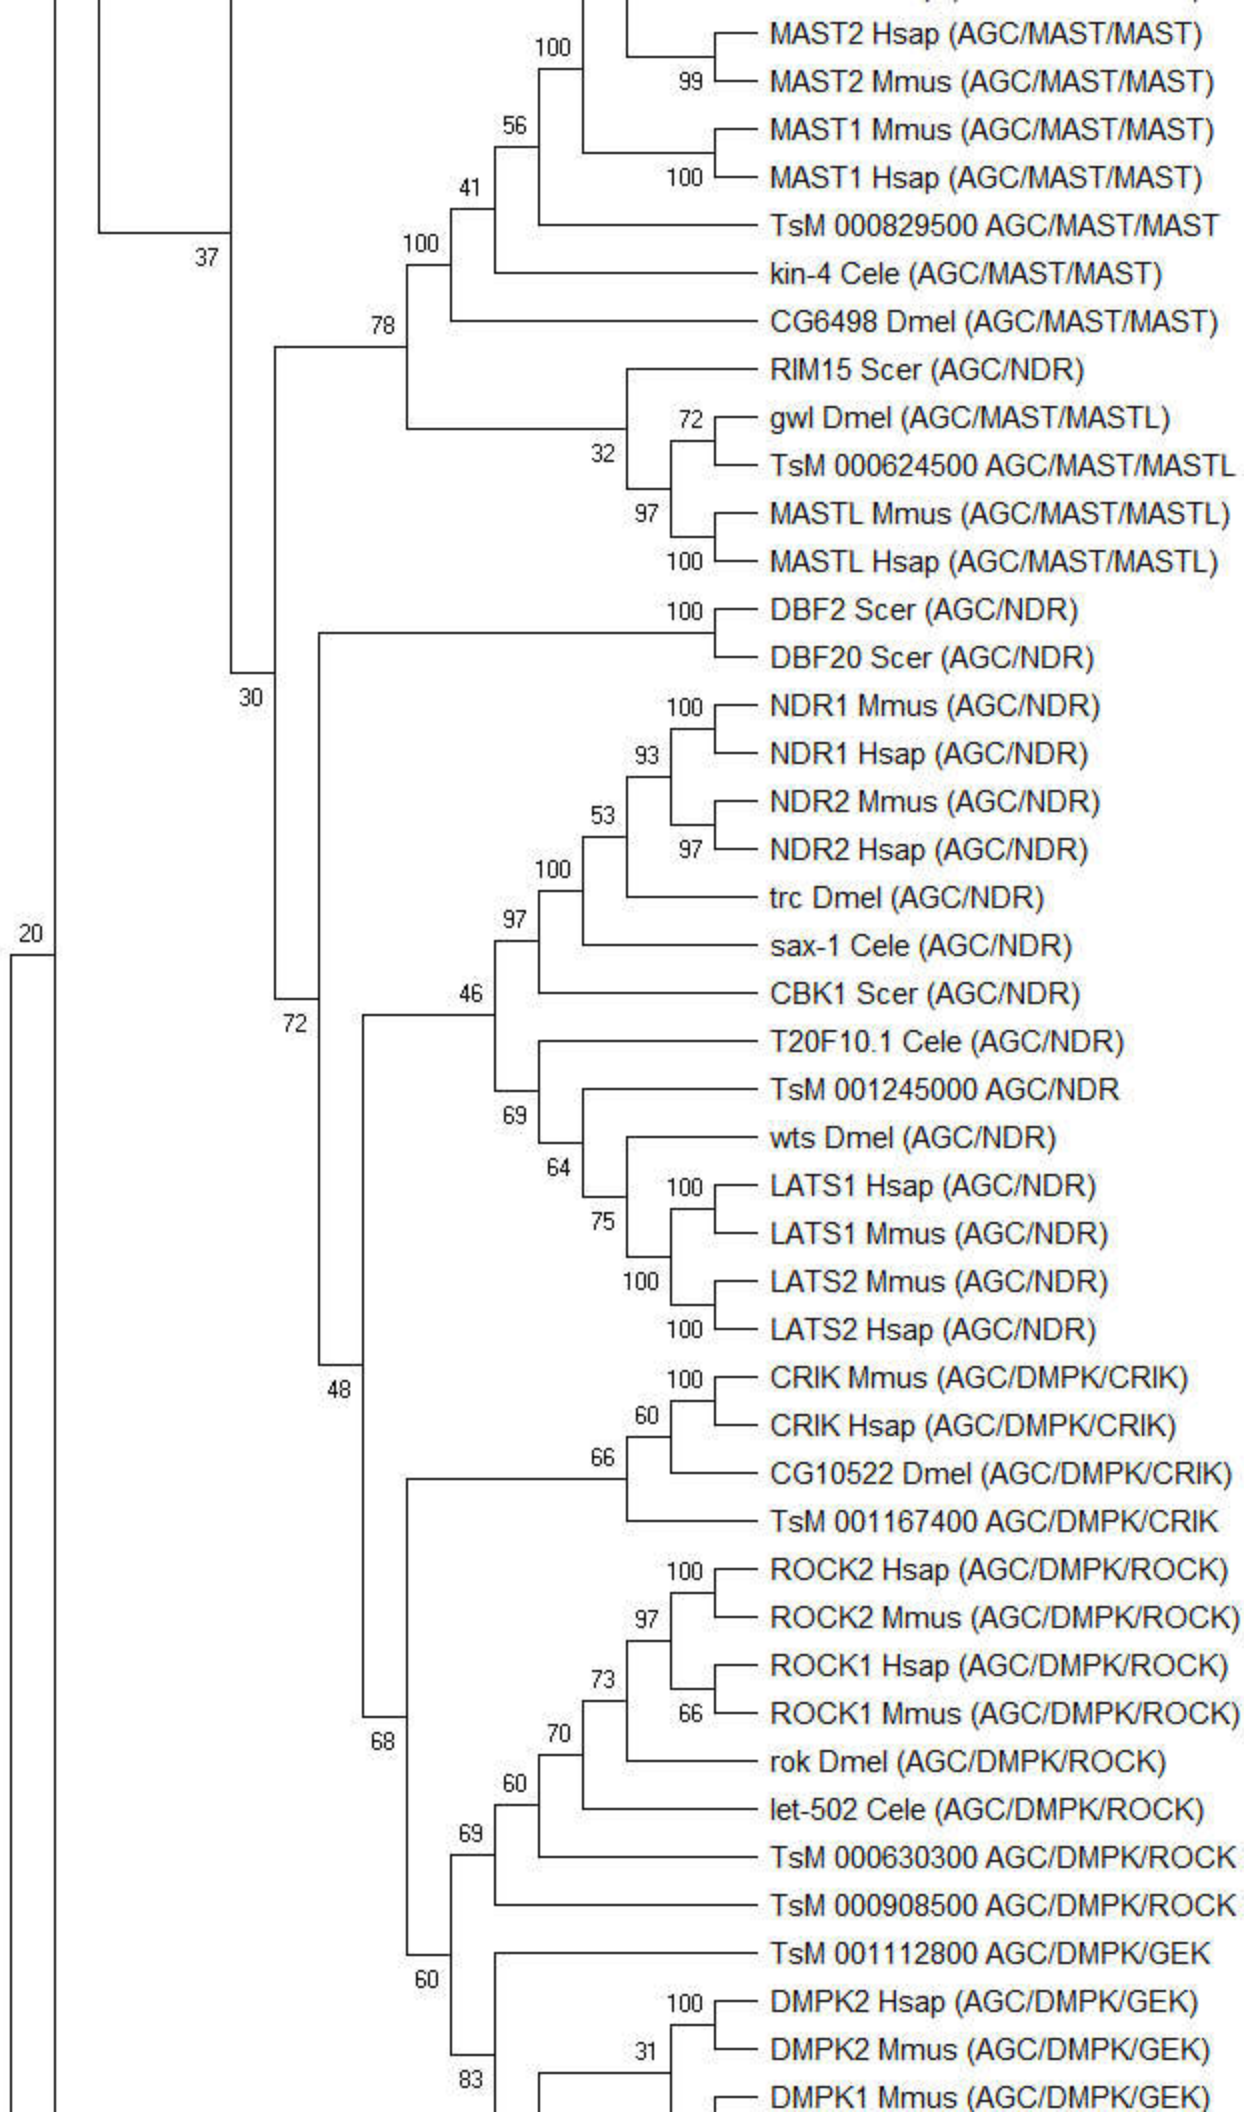



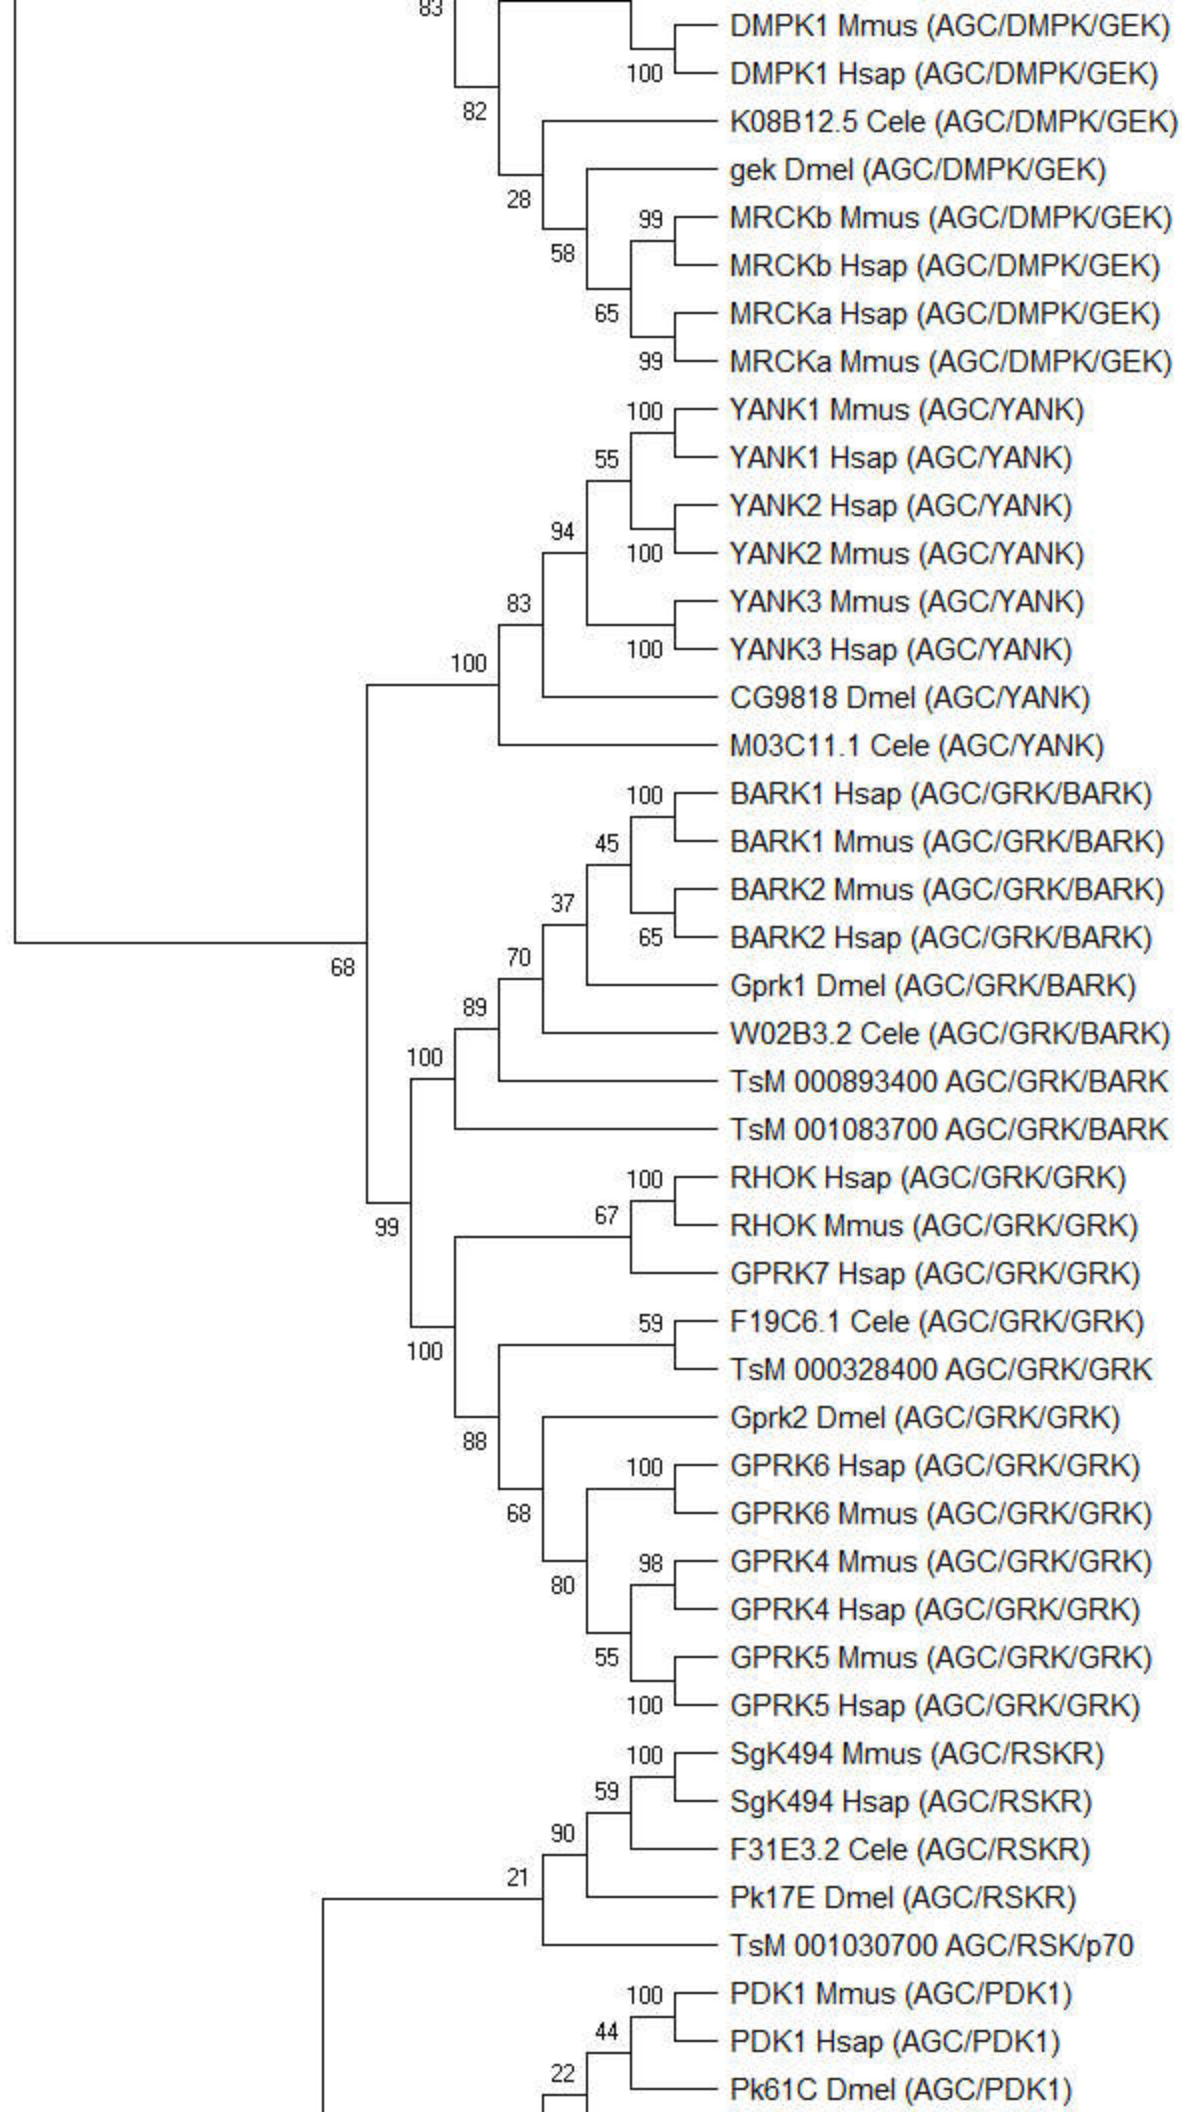

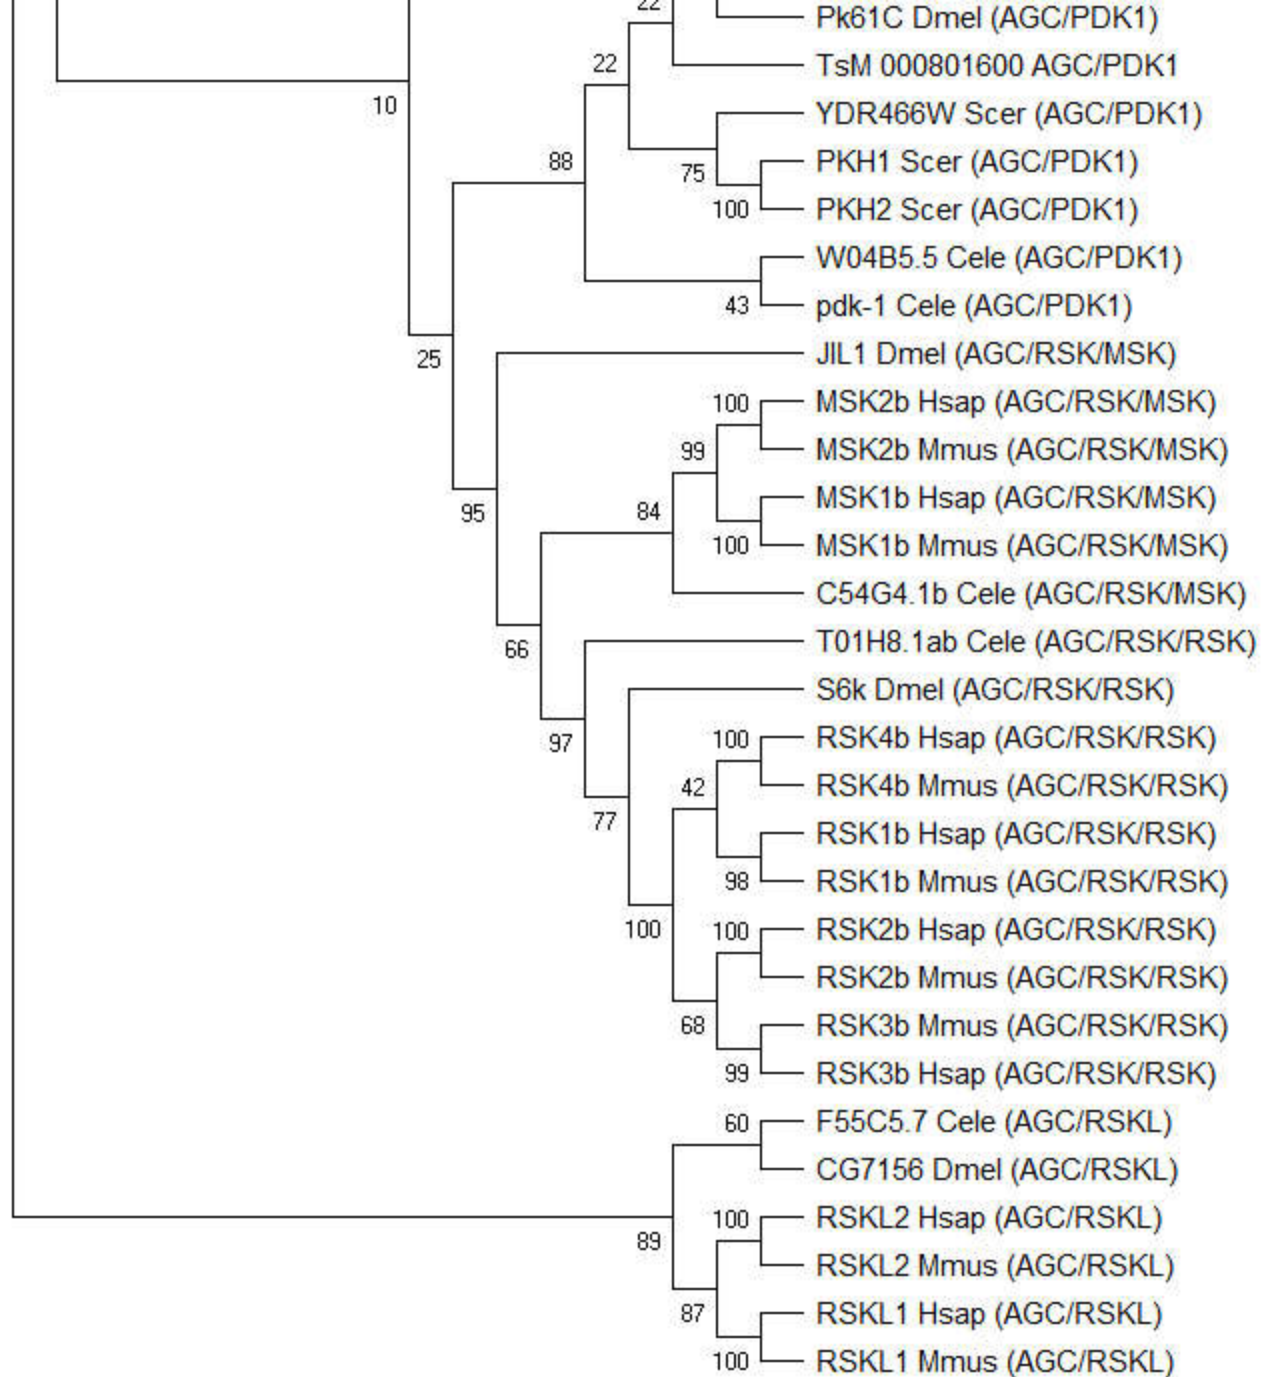

Supplement: Supplementary file 4 [file 1]

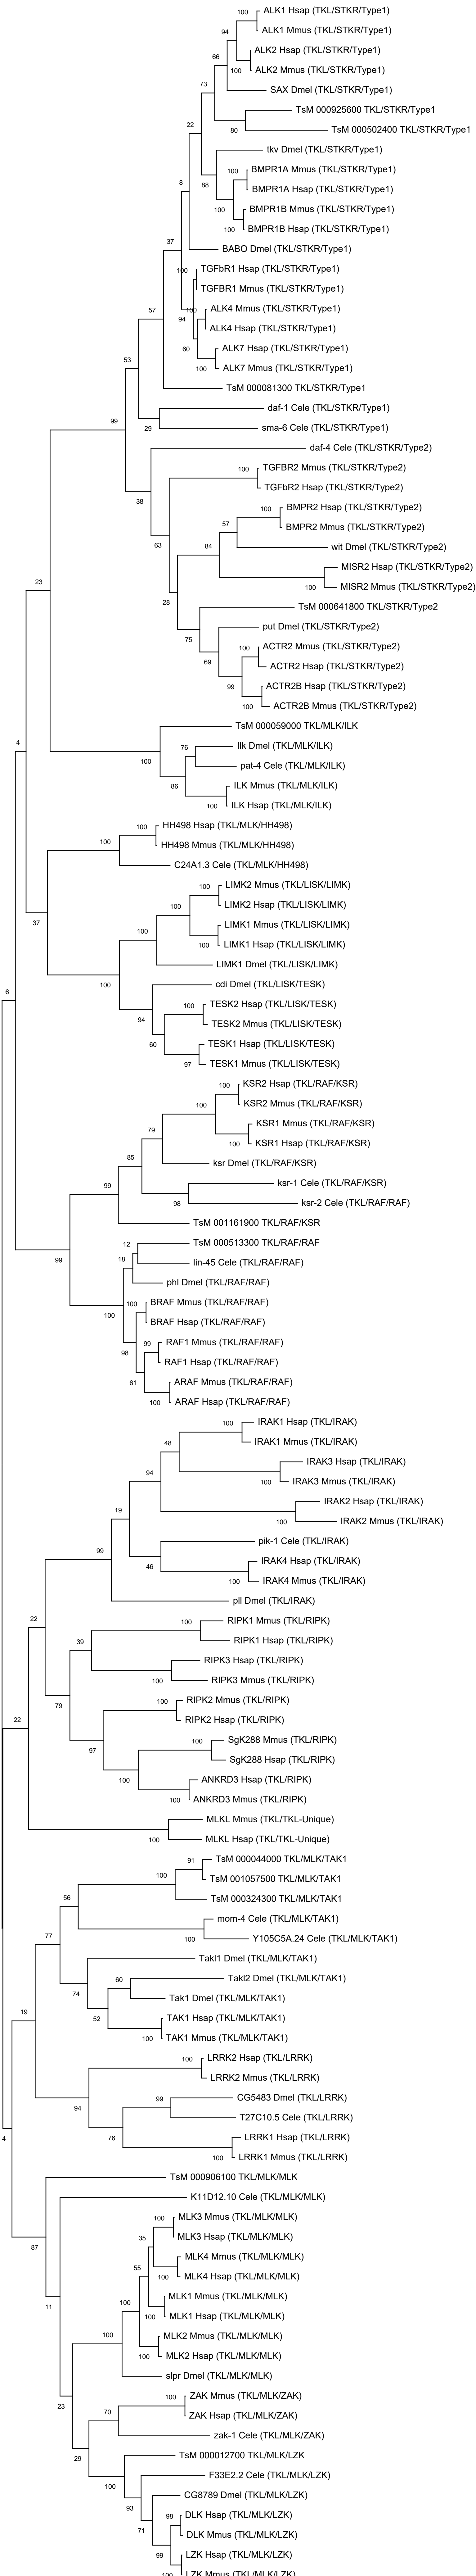

Supplement: Supplementary file 5 [file 1]

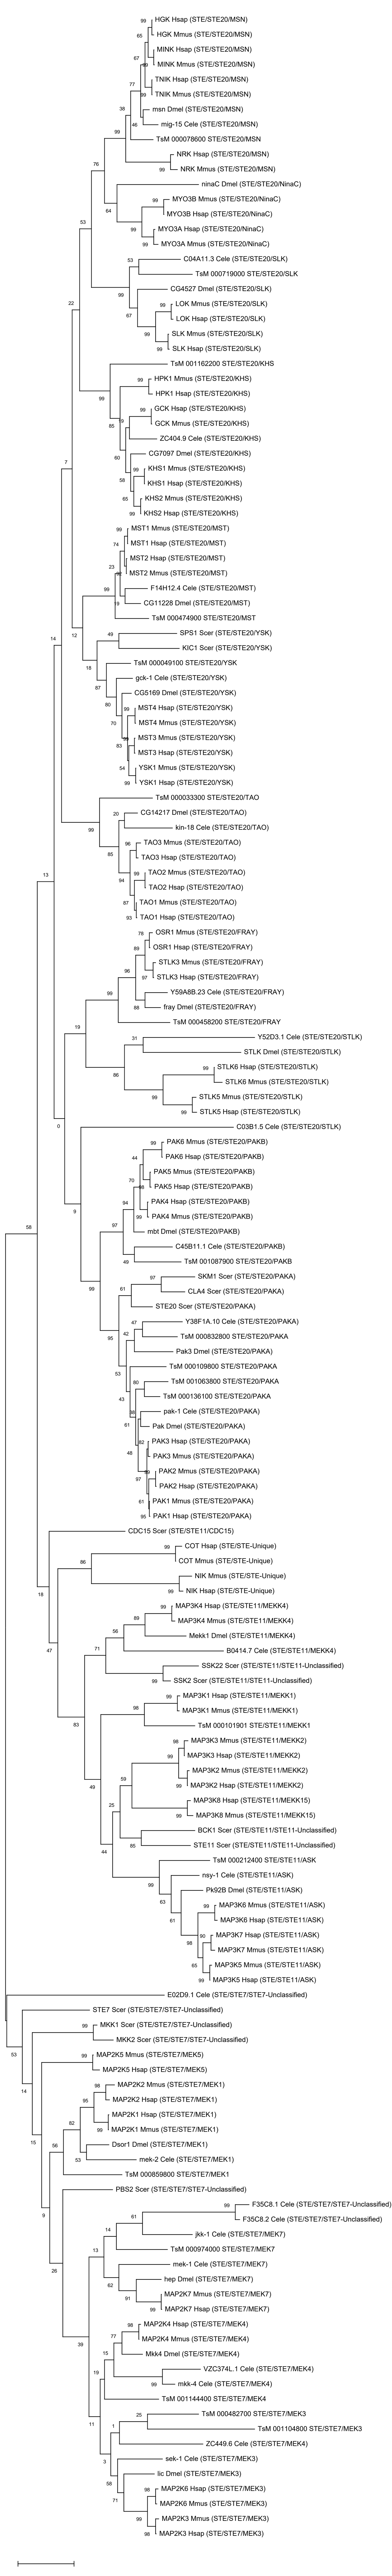

0.50

Supplement: Supplementary file 6 [file 1]

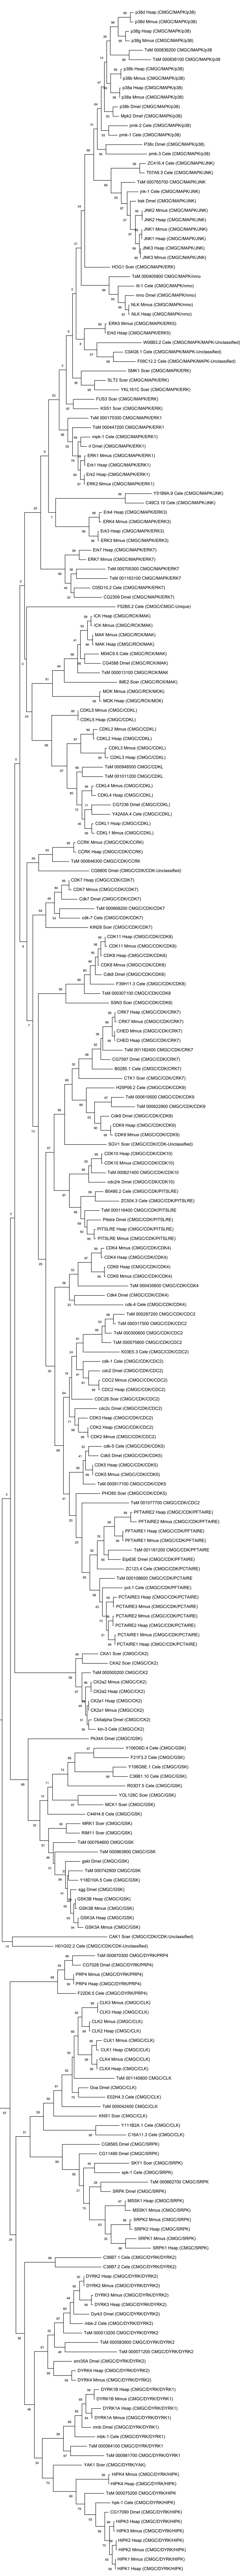

Supplement: Supplementary file 7 [file 1]

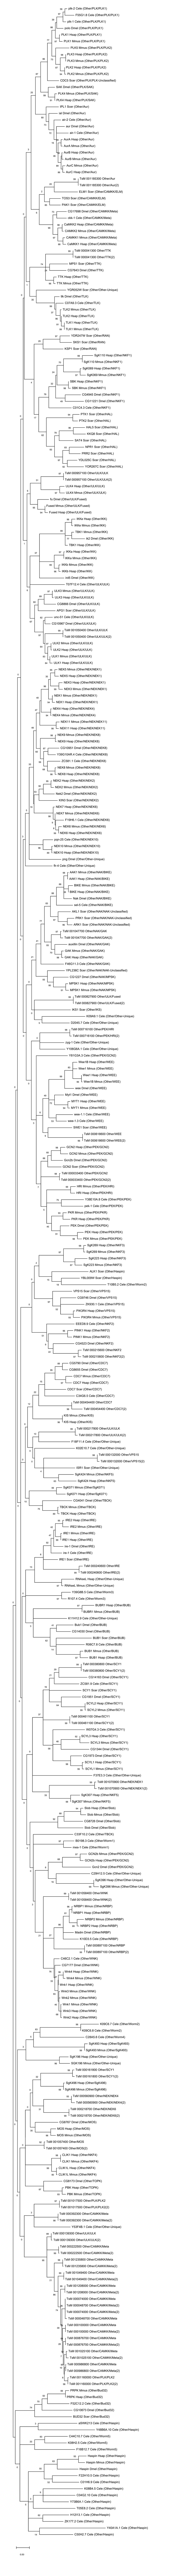

Supplement: Supplementary file 8 [file 1]

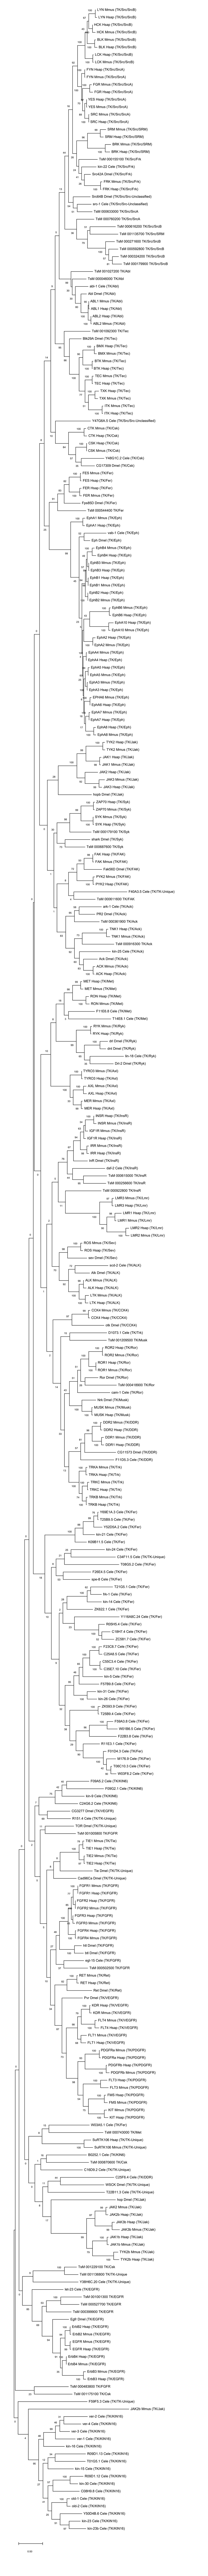

Supplement: Supplementary file 9 [file 1]
